# Supplementary material
Source: PubMed Central journal article supplement (PMC2925221)
Supplement: NIHMS221126-supplement-1_si_001.pdf [file NIHMS221126-supplement-1_si_001.pdf]

Supplementary Information

**Structural and kinetic characterization of human deoxycytidine kinase variants able to phosphorylate 5-substituted deoxycytidine and thymidine analogs**

Saugata Hazra, Stephan Ort, Manfred Konrad, and Arnon Lavie

**Content**

Table S1

Table S2

| <b>Table S1: Steady state kinetic analysis of WT dCK and the R104M-D133A double mutant</b> |                   |                          |                 |                                 |                        |                |                                 |
|--------------------------------------------------------------------------------------------|-------------------|--------------------------|-----------------|---------------------------------|------------------------|----------------|---------------------------------|
|                                                                                            | Nucleoside        | dCK WT                   |                 |                                 | dCK R104M-D133A        |                |                                 |
|                                                                                            |                   | $k_{cat}$ ( $s^{-1}$ )   | Km ( $\mu M$ )  | $k_{cat}/Km$ ( $M^{-1}s^{-1}$ ) | $k_{cat}$ ( $s^{-1}$ ) | Km ( $\mu M$ ) | $k_{cat}/Km$ ( $M^{-1}s^{-1}$ ) |
| <b>A</b>                                                                                   | D-dC <sup>c</sup> | 0.040±0.001 <sup>a</sup> | < 3             | > 13.3x10 <sup>3</sup>          | 1.80±0.04              | 5.70±0.44      | 315.8x10 <sup>3</sup>           |
|                                                                                            | D-dA <sup>c</sup> | 2.13±0.35                | 115±4           | 18.6x10 <sup>3</sup>            | 4.51±0.33              | 1040±117       | 4.3x10 <sup>3</sup>             |
|                                                                                            | D-dG <sup>c</sup> | 2.60±0.10                | 231±20          | 11.3x10 <sup>3</sup>            | 1.73±0.12              | 1865±211       | 0.9x10 <sup>3</sup>             |
| <b>B</b>                                                                                   | 5-Me-dC           | 0.070±0.02               | 7.8±1.2         | 9.0x10 <sup>3</sup>             | 0.36±0.02              | 4.16±1.54      | 87x10 <sup>3</sup>              |
|                                                                                            |                   |                          |                 |                                 |                        |                |                                 |
| <b>C</b>                                                                                   | Gem <sup>c</sup>  | 0.39±0.03                | 16.1±3.5        | 24.2x10 <sup>3</sup>            | 2.68±0.07              | 56±17          | 47.7x10 <sup>3</sup>            |
|                                                                                            | AraC <sup>c</sup> | 0.34±0.01                | 13.1±1.1        | 26.0x10 <sup>3</sup>            | 1.43±0.03              | 137±10         | 10.5x10 <sup>3</sup>            |
| <b>D</b>                                                                                   | D-dT <sup>c</sup> | nm <sup>b</sup>          | nm <sup>b</sup> | nm <sup>b</sup>                 | 1.74±0.01              | 144±10         | 12.1x10 <sup>3</sup>            |
|                                                                                            | L-dT <sup>c</sup> | nm <sup>b</sup>          | nm <sup>b</sup> | nm <sup>b</sup>                 | 3.13±0.10              | 138±10         | 22.7x10 <sup>3</sup>            |
| <b>E</b>                                                                                   | BVdU              | nm <sup>b</sup>          | nm <sup>b</sup> | nm <sup>b</sup>                 | 1.21±0.08              | 108±17         | 11.2x10 <sup>3</sup>            |
|                                                                                            | L-dU              | nm <sup>b</sup>          | nm <sup>b</sup> | nm <sup>b</sup>                 | 10.60±1.44             | 1058±242       | 10.0x10 <sup>3</sup>            |

<sup>a</sup> standard deviation  
<sup>b</sup>nm: not measured; rate is very low for these nucleosides with WT dCK.  
<sup>c</sup>Data taken from Hazra et al, Biochemistry, 2009.  
The concentration of ATP was kept constant at 1 mM.

| <b>Table S2: Efficiency change for dC-analog phosphorylation between WT and mutant dCK</b> |         |                                           |                             |                      |  |
|--------------------------------------------------------------------------------------------|---------|-------------------------------------------|-----------------------------|----------------------|--|
|                                                                                            |         | <b>dCK WT</b>                             | <b>dCK R104M-D133A</b>      |                      |  |
|                                                                                            |         | R1 = CE <sup>a</sup> (dC) / CE(dC-analog) | R2 = CE(dC) / CE(dC-analog) | R2/R1 <sup>b</sup>   |  |
| <b>A</b>                                                                                   | D-dC    | 1                                         | 1                           | > 23.75 <sup>c</sup> |  |
| <b>B</b>                                                                                   | 5-Me-dC | > 1.47                                    | 3.63                        | > 2.47               |  |
| <b>C</b>                                                                                   | Gem     | > 0.55                                    | 6.62                        | > 12.04              |  |
|                                                                                            | AraC    | > 0.51                                    | 30.10                       | > 59.02              |  |

<sup>a</sup> CE = catalytic efficiency,  $k_{cat}/K_m$   
<sup>b</sup> R2/R1 is a double ratio, i.e. the ratio of two ratios; this gives a measure of specificity change.  
<sup>c</sup> This number the single ratio of  $k_{cat}/K_m$  of dCK of the mutant versus WT dCK.
